# Supplementary material for: Does the Cognitive Reflection Test Work with Chinese College Students? Evidence from a Time-Limited Study
Source: MDPI journal article supplement (doi:10.3390/bs14040348), 2024-04-22
Supplement: s1 [file s1]

Conflict conditions (10):

1. A cheese and two breads cost a total of \$2.8.

A cheese is \$2 more expensive than two breads.

Question: How much does a bread cost?

2. An orange and two tangerines cost a total of \$4.6.

An orange is \$4 more expensive than two tangerines.

Question: How much does a tangerine cost?

3. A light bulb and two pillows cost a total of \$3.4.

A light bulb is \$3 more expensive than two pillows.

Question: How much does a pillow cost?

4. A necklace and two rings cost a total of \$2.2.

A necklace is \$2 more expensive than two rings.

Question: How much does a ring cost?

5. A table and two chairs cost a total of \$5.4.

A table is \$5 more expensive than two chairs.

Question: How much does a chair cost?

6. A keyboard and two mice cost a total of \$2.8.

A keyboard is \$2 more expensive than two mice.

Question: How much does a mouse cost?

7. A frying pan and two spatulas cost a total of \$7.4.

A frying pan is \$7 more expensive than two spatulas.

Question: How much does a spatula cost?

8. A grapefruit and two apples cost a total of \$3.6.

A grapefruit is \$3 more expensive than two apples.

Question: How much does an apple cost?

9. A toast and two egg tarts cost a total of \$1.1.

A toast is \$1 more expensive than two egg tarts.

Question: How much does an egg tart cost?

10. A pen and two pencils cost a total of \$3.6.

A pen is \$3 more expensive than two pencils.

Question: How much does a pencil cost?

Non-conflict conditions (10):

1. A store manager bought a total of 170 bananas and kiwis.

There are 100 bananas.

Question: How many kiwis are there?

2. A store is displaying 280 pianos and xylophones.

There are 100 pianos.

Question: How many xylophones are there?

3. There are 470 neurologists and botanists at the conference.

There are 400 neurologists.

Question: How many botanists are there at the conference?

4. A wood company bought 570 drills and saws.

There are 500 saws.

Question: How many drills does this company have?

5. A retail store is classifying a total of 180 oranges and lemons.

There are 100 oranges.

Question: How many lemons need to be classified?

6. There are 430 daisies and jasmine flowers by the lake.

There are 400 daisies.

Question: How many jasmine flowers are there by the lake?

7. In the city, people use a total of 650 small motorcycles and bicycles.

There are 600 small motorcycles.

Question: How many bicycles are there in the city?

8. In the grassland, scientists found 150 zebras and elephants.

There are 100 zebras.

Question: How many elephants are there in the grassland?

9. There are 260 kangaroos and peacocks in the zoo.

There are 200 kangaroos.

Question: How many peacocks are there in the zoo?

10. There are 320 peaches and pears in the fruit shop.

There are 300 peaches.

Question: How many pears are there in the fruit shop?

Interference questions (10):

1. A cheese and two breads cost a total of \$2.8.

A cheese is \$2 more expensive than two breads.

Question: How many characters are presented in the stem?

2. An orange and two tangerines cost a total of \$4.6.

An orange is \$4 more expensive than two tangerines.

Question: How many times does the word "orange" appear in the stem?

3. A light bulb and two pillows cost a total of \$3.4.

A light bulb is \$3 more expensive than two pillows.

Question: How many characters are presented in the stem?

4. A necklace and two rings cost a total of \$2.2.

A necklace is \$2 more expensive than two rings.

Question: How many times does the word "necklace" appear in the stem?

5. A table and two chairs cost a total of \$5.4.

A table is \$5 more expensive than two chairs.

Question: How many times does the letter 'o' appear in the stem?

6. A keyboard and two mice cost a total of \$2.8.

A keyboard is \$2 more expensive than two mice.

Question: How many types of electronic products are presented in the stem?

7. A frying pan and two spatulas cost a total of \$7.4.

A frying pan is \$7 more expensive than two spatulas.

Question: How many times does the letter 'a' appear in the stem?

8. A grapefruit and two apples cost a total of \$3.6.

A grapefruit is \$3 more expensive than two apples.

Question: How many types of fruits are presented in the stem?

9. A toast and two egg tarts cost a total of \$1.1.

A toast is \$1 more expensive than two egg tarts.

Question: What is the sum of the numbers that appear?

10. A pen and two pencils cost a total of \$3.6.

A pen is \$3 more expensive than two pencils.

Question: What is the sum of the numbers that appear?
